# Supplementary material for: Two-dimensional AlN/TMO van der Waals heterojunction as a promising photocatalyst for water splitting driven by visible light
Source: Royal Society of Chemistry journal article supplement (doi:10.1039/d3cp04120d), 2023-01-01
Supplement: d3cp04120d1.pdf [file d3cp04120d1.pdf]

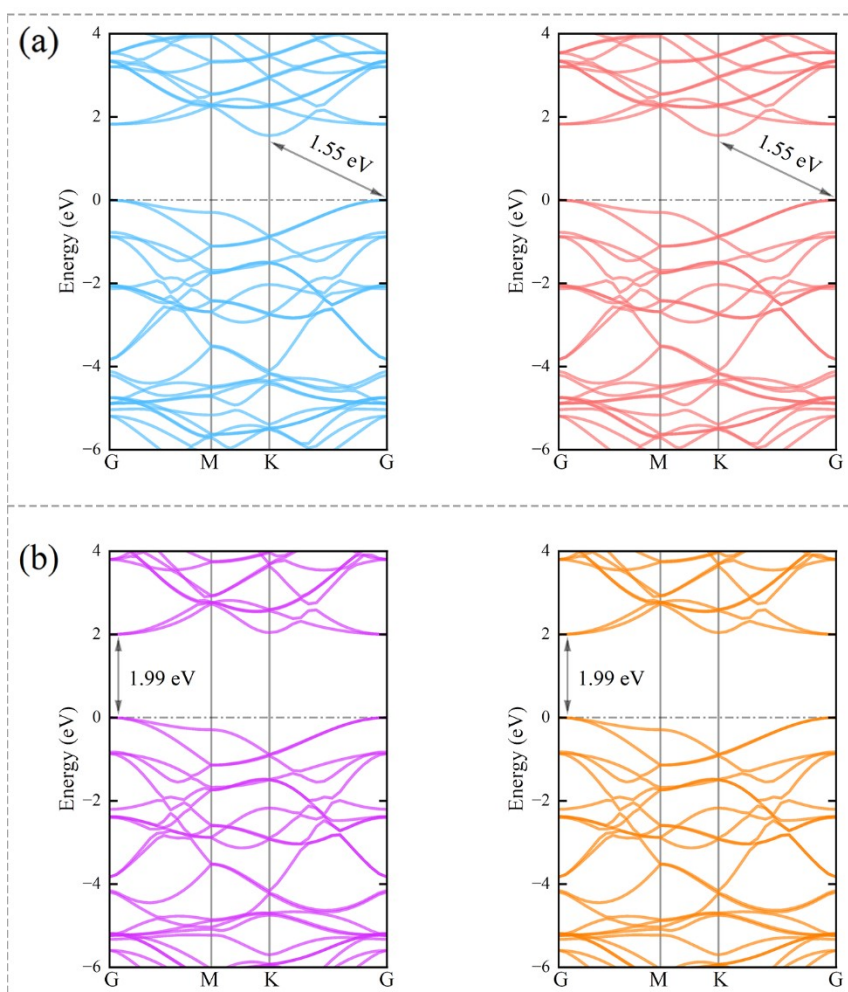

Band gap values of configuration 2 and configuration 4 of (a) the AlN/MoO<sub>2</sub> heterojunction (b) the AlN/WO<sub>2</sub> heterojunction.

Since the binding energies calculated for configuration 2 and configuration 4 are the same, we calculated the HSE06 band values for both configurations. The results showed that both configurations give the same result, so there is no difference between choosing configuration 2 or configuration 4.
